# Supplementary material for: Stratification of chemotherapy-treated stage III colorectal cancer patients using multiplexed imaging and single-cell analysis of T-cell populations
Source: PubMed Central journal article supplement (PMC8964416; doi:10.1038/s41379-021-00953-0), 2021-11-03
Supplement: 41379_2021_953_MOESM1_ESM.pdf [file 41379_2021_953_MOESM1_ESM.pdf]

Supp.Table 1: Demographic data of validation cohort

|                        | <b>Overall<br/>(N=191)</b> |
|------------------------|----------------------------|
| <b>DFS (months)</b>    |                            |
| Mean (SD)              | 54.6 (33.0)                |
| Median [Min, Max]      | 57.0 [2.00, 158]           |
| <b>OS (months)</b>     |                            |
| Mean (SD)              | 63.0 (30.5)                |
| Median [Min, Max]      | 61.0 [2.00, 159]           |
| <b>sex</b>             |                            |
| female                 | 101 (52.9%)                |
| male                   | 90 (47.1%)                 |
| <b>T</b>               |                            |
| 1                      | 7 (3.7%)                   |
| 2                      | 22 (11.5%)                 |
| 3                      | 128 (67.0%)                |
| 4                      | 34 (17.8%)                 |
| <b>N</b>               |                            |
| 1                      | 129 (67.5%)                |
| 2                      | 62 (32.5%)                 |
| <b>age (years)</b>     |                            |
| Mean (SD)              | 59.3 (12.6)                |
| Median [Min, Max]      | 59.0 [28.0, 88.0]          |
| <b>LNC</b>             |                            |
| Mean (SD)              | 21.3 (11.0)                |
| Median [Min, Max]      | 19.0 [5.00, 73.0]          |
| <b>PLN</b>             |                            |
| Mean (SD)              | 3.28 (2.89)                |
| Median [Min, Max]      | 2.00 [0, 14.0]             |
| <b>LVI</b>             |                            |
| no                     | 48 (25.1%)                 |
| suspected              | 15 (7.9%)                  |
| yes                    | 128 (67.0%)                |
| <b>differentiation</b> |                            |
| moderate to well       | 147 (77.0%)                |
| poor                   | 44 (23.0%)                 |
| <b>MSI status</b>      |                            |
| MSI                    | 16 (8.4%)                  |
| MSS                    | 175 (91.6%)                |

\*LNC=Lymph Node Count, \*PLN=Positive Lymph Nodes,

\*LVI=Lymphovascular Invasion

Supplementary Table 2: Antibodies, clones and conjugates used in this study.

| <b>Target</b>            | <b>Clone</b>  | <b>Vendor</b>  | <b>Catalog</b> | <b>Concentration</b> | <b>Staining round</b> |
|--------------------------|---------------|----------------|----------------|----------------------|-----------------------|
| APAF-1                   | 2E12          | Millipore      | MAB3053        | 5                    | 1                     |
| Bak                      | D4E4          | Cell Signaling | 12105          | 5                    | 5                     |
| Bax                      | E63           | Abcam          | ab216985       | 10                   | 4                     |
| BCL-2                    | 124           | Lifespan       | LS-C389442     | 5                    | 1                     |
| Bcl-xL                   | 7D9           | Thermo         | MS-1334        | 10                   | 6                     |
| CA9                      | polyclonal    | Thermo         | PA1-16592      | 15                   | 11                    |
| Caspase-3 (Pro+cleaved)  | D3R6Y         | Cell Signaling | 14214          | 10                   | 3                     |
| Caspase-9                | 96.1.23       | Santa Cruz     | sc-56076 A647  | 5                    | 2                     |
| <b>CD3</b>               | F7.2.38       | Dako           | M7254          | 10                   | 12                    |
| <b>CD4</b>               | EPR6855       | Abcam          | ab181724       | 5                    | 9                     |
| <b>CD8</b>               | C8/144B       | Dako           | M7103          | 5                    | 7                     |
| <b>CD45</b>              | 2B11 + PD7/26 | Dako           | M0701          | 10                   | 10                    |
| <b>Cytokeratin AE1</b>   | AE1           | eBioscience    | 14-9001        | 2.5                  | 8                     |
| <b>Cytokeratin PCK26</b> | PCK26         | Sigma          | C1801          | 5                    | 7                     |
| <b>FOXP3</b>             | 206D          | Biolegend      | 320014         | 10                   | 8                     |
| Glut-1                   | EPR3915       | Abcam          | ab196357       | 5                    | 11                    |
| HLA I                    | EMR8 5        | Abcam          | ab70328        | 10                   | 10                    |
| Ki67                     | SP6           | Zeta           | Z2031          | 10                   | 9                     |
| MCL-1                    | Y37           | Abcam          | ab186822       | 10                   | 2                     |
| <b>NAKATPase</b>         | EP1845Y       | Abcam          | ab167390       | 5                    | 6                     |
| <b>S6</b>                | C-8           | Santa Cruz     | sc-74459 A647  | 5                    | 13                    |
| Smac                     | 79-1-83       | Cell Signaling | 2954           | 10                   | 4                     |
| <b>PD1</b>               | EPR4877(2)    | Abcam          | ab201825       | 5                    | 12                    |
| XIAP (API3)              | polyclonal    | Thermo         | APH937         | 7.5                  | 5                     |

Supplementary Table 3: Hazard Ratios for single-marker and multi-marker T cell subsets for average of cores.

| <b>Multi-Marker</b>         |            |                      |                |           |                      |                |
|-----------------------------|------------|----------------------|----------------|-----------|----------------------|----------------|
| <b>% of Total</b>           | <b>DFS</b> |                      |                | <b>OS</b> |                      |                |
| <b>Stroma</b>               | <b>HR</b>  | <b>95% CI for HR</b> | <b>p.value</b> | <b>HR</b> | <b>95% CI for HR</b> | <b>p.value</b> |
| <b>Tc</b>                   | 0.62       | 0.3-1.3              | 0.2            | 0.62      | 0.22-1.7             | 0.36           |
| <b>TcPD1</b>                | 0.4        | 0.11-1.4             | 0.15           | 0.92      | 0.29-3               | 0.89           |
| <b>Th</b>                   | 0.13       | 0.0055-3             | 0.2            | 0.1       | 0.0011-9.8           | 0.33           |
| <b>ThPD1</b>                | 0.51       | 0.18-1.4             | 0.19           | 0.65      | 0.2-2.2              | 0.48           |
| <b>Treg</b>                 | 0.38       | 0.14-1               | 0.052          | 0.17      | 0.025-1.1            | 0.067          |
| <b>TregPD1</b>              | 0.3        | 0.05-1.8             | 0.19           | 0.49      | 0.055-4.3            | 0.52           |
| <b>Epithelia-associated</b> |            |                      |                |           |                      |                |
| <b>Tc</b>                   | 0.097      | 0.0034-2.8           | 0.17           | 0.024     | 7.6e-05-7.5          | 0.2            |
| <b>TcPD1</b>                | 0.066      | 0.0035-1.2           | 0.07           | 0.19      | 0.007-5.2            | 0.33           |
| <b>Th</b>                   | 3.90E+07   | 0.0026-6e+17         | 0.14           | 7.40E-12  | 3e-50-1.8e+27        | 0.57           |
| <b>ThPD1</b>                | 0.27       | 0.011-6.5            | 0.42           | 0.1       | 0.00055-18           | 0.39           |
| <b>Treg</b>                 | 2.10E-15   | 1.1e-30-3.9          | 0.06           | 4.30E-18  | 2.7e-41-680000       | 0.14           |
| <b>TregPD1</b>              | 3.50E-06   | 3.5e-15-3600         | 0.24           | 5.90E-15  | 2.7e-33-13000        | 0.13           |
| <b>Single-Marker</b>        |            |                      |                |           |                      |                |
| <b>% of Total</b>           | <b>DFS</b> |                      |                | <b>OS</b> |                      |                |
| <b>Stroma</b>               | <b>HR</b>  | <b>95% CI for HR</b> | <b>p.value</b> | <b>HR</b> | <b>95% CI for HR</b> | <b>p.value</b> |
| <b>CD3</b>                  | 0.87       | 0.71-1.1             | 0.16           | 0.94      | 0.75-1.2             | 0.56           |
| <b>CD4</b>                  | 0.87       | 0.74-1               | 0.1            | 0.86      | 0.69-1.1             | 0.21           |
| <b>CD8</b>                  | 0.76       | 0.57-1               | 0.07           | 0.83      | 0.58-1.2             | 0.3            |
| <b>FOXP3</b>                | 0.78       | 0.56-1.1             | 0.14           | 0.67      | 0.39-1.2             | 0.15           |
| <b>PD1</b>                  | 0.5        | 0.2-1.2              | 0.12           | 0.83      | 0.33-2.1             | 0.7            |
| <b>Epithelia-associated</b> |            |                      |                |           |                      |                |
| <b>CD3</b>                  | 0.64       | 0.29-1.4             | 0.27           | 0.75      | 0.28-2               | 0.56           |
| <b>CD4</b>                  | 0.52       | 0.082-3.3            | 0.49           | 0.027     | 0.00015-4.8          | 0.17           |
| <b>CD8</b>                  | 0.34       | 0.1-1.1              | 0.081          | 0.36      | 0.071-1.8            | 0.21           |
| <b>FOXP3</b>                | 0.00018    | 2.4e-09-13           | 0.13           | 6.10E-10  | 3.7e-20-10           | 0.077          |
| <b>PD1</b>                  | 0.052      | 0.0023-1.2           | 0.064          | 0.13      | 0.0035-4.9           | 0.27           |

| Supplementary Table 4: Hazard Ratios for single-marker and multi-marker T cell subsets from immune hot-spot |          |                 |         |          |                 |         |
|-------------------------------------------------------------------------------------------------------------|----------|-----------------|---------|----------|-----------------|---------|
| Multi-Marker                                                                                                |          |                 |         |          |                 |         |
| % of Total                                                                                                  | DFS      |                 |         | OS       |                 |         |
| Stroma                                                                                                      | HR       | 95% CI for HR   | p.value | HR       | 95% CI for HR   | p.value |
| Tc                                                                                                          | 0.84     | 0.58-1.2        | 0.37    | 0.83     | 0.47-1.4        | 0.51    |
| TcPD1                                                                                                       | 0.67     | 0.33-1.4        | 0.27    | 1        | 0.49-2.1        | 0.95    |
| Th                                                                                                          | 0.59     | 0.17-2          | 0.4     | 0.31     | 0.026-3.6       | 0.35    |
| ThPD1                                                                                                       | 0.79     | 0.46-1.4        | 0.39    | 0.8      | 0.4-1.6         | 0.54    |
| Treg                                                                                                        | 0.52     | 0.27-0.98       | 0.042*  | 0.25     | 0.061-1         | 0.052   |
| TregPD1                                                                                                     | 0.59     | 0.24-1.5        | 0.25    | 0.8      | 0.28-2.3        | 0.68    |
| Epithelia-associated                                                                                        |          |                 |         |          |                 |         |
| Tc                                                                                                          | 0.39     | 0.059-2.6       | 0.33    | 0.22     | 0.0099-4.9      | 0.34    |
| TcPD1                                                                                                       | 0.32     | 0.063-1.6       | 0.16    | 0.33     | 0.035-3.1       | 0.33    |
| Th                                                                                                          | 3300     | 5.2e-06-2.1e+12 | 0.43    | 0.052    | 4.2e-19-6.5e+15 | 0.88    |
| ThPD1                                                                                                       | 0.9      | 0.27-3          | 0.86    | 0.5      | 0.05-4.9        | 0.55    |
| Treg                                                                                                        | 6.90E-08 | 2e-17-240       | 0.14    | 1.70E-13 | 7.3e-32-410000  | 0.17    |
| TregPD1                                                                                                     | 0.71     | 1.3e-05-40000   | 0.95    | 7.50E-11 | 2.5e-24-2300    | 0.14    |
| Single-Marker                                                                                               |          |                 |         |          |                 |         |
| % of Total                                                                                                  | DFS      |                 |         | OS       |                 |         |
| Stroma                                                                                                      | HR       | 95% CI for HR   | p.value | HR       | 95% CI for HR   | p.value |
| CD3                                                                                                         | 0.91     | 0.8-1           | 0.17    | 0.94     | 0.8-1.1         | 0.45    |
| CD4                                                                                                         | 0.92     | 0.83-1          | 0.11    | 0.89     | 0.76-1          | 0.13    |
| CD8                                                                                                         | 0.86     | 0.71-1          | 0.12    | 0.83     | 0.62-1.1        | 0.2     |
| FOXP3                                                                                                       | 0.77     | 0.59-1          | 0.052   | 0.66     | 0.43-1          | 0.066   |
| PD1                                                                                                         | 0.7      | 0.41-1.2        | 0.21    | 0.88     | 0.47-1.6        | 0.68    |
| Epithelia-associated                                                                                        |          |                 |         |          |                 |         |
| CD3                                                                                                         | 1        | 0.73-1.5        | 0.87    | 1.1      | 0.74-1.7        | 0.59    |
| CD4                                                                                                         | 0.91     | 0.44-1.9        | 0.81    | 0.38     | 0.044-3.4       | 0.39    |
| CD8                                                                                                         | 0.45     | 0.19-1.1        | 0.085   | 0.3      | 0.064-1.4       | 0.13    |
| FOXP3                                                                                                       | 0.11     | 0.00019-61      | 0.49    | 7.90E-05 | 7.6e-11-81      | 0.18    |
| PD1                                                                                                         | 0.2      | 0.029-1.3       | 0.097   | 0.23     | 0.018-2.8       | 0.25    |

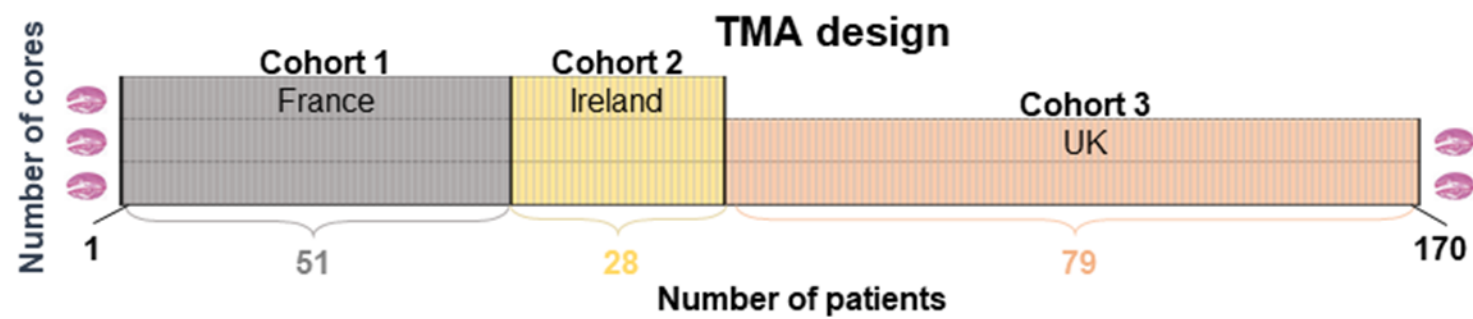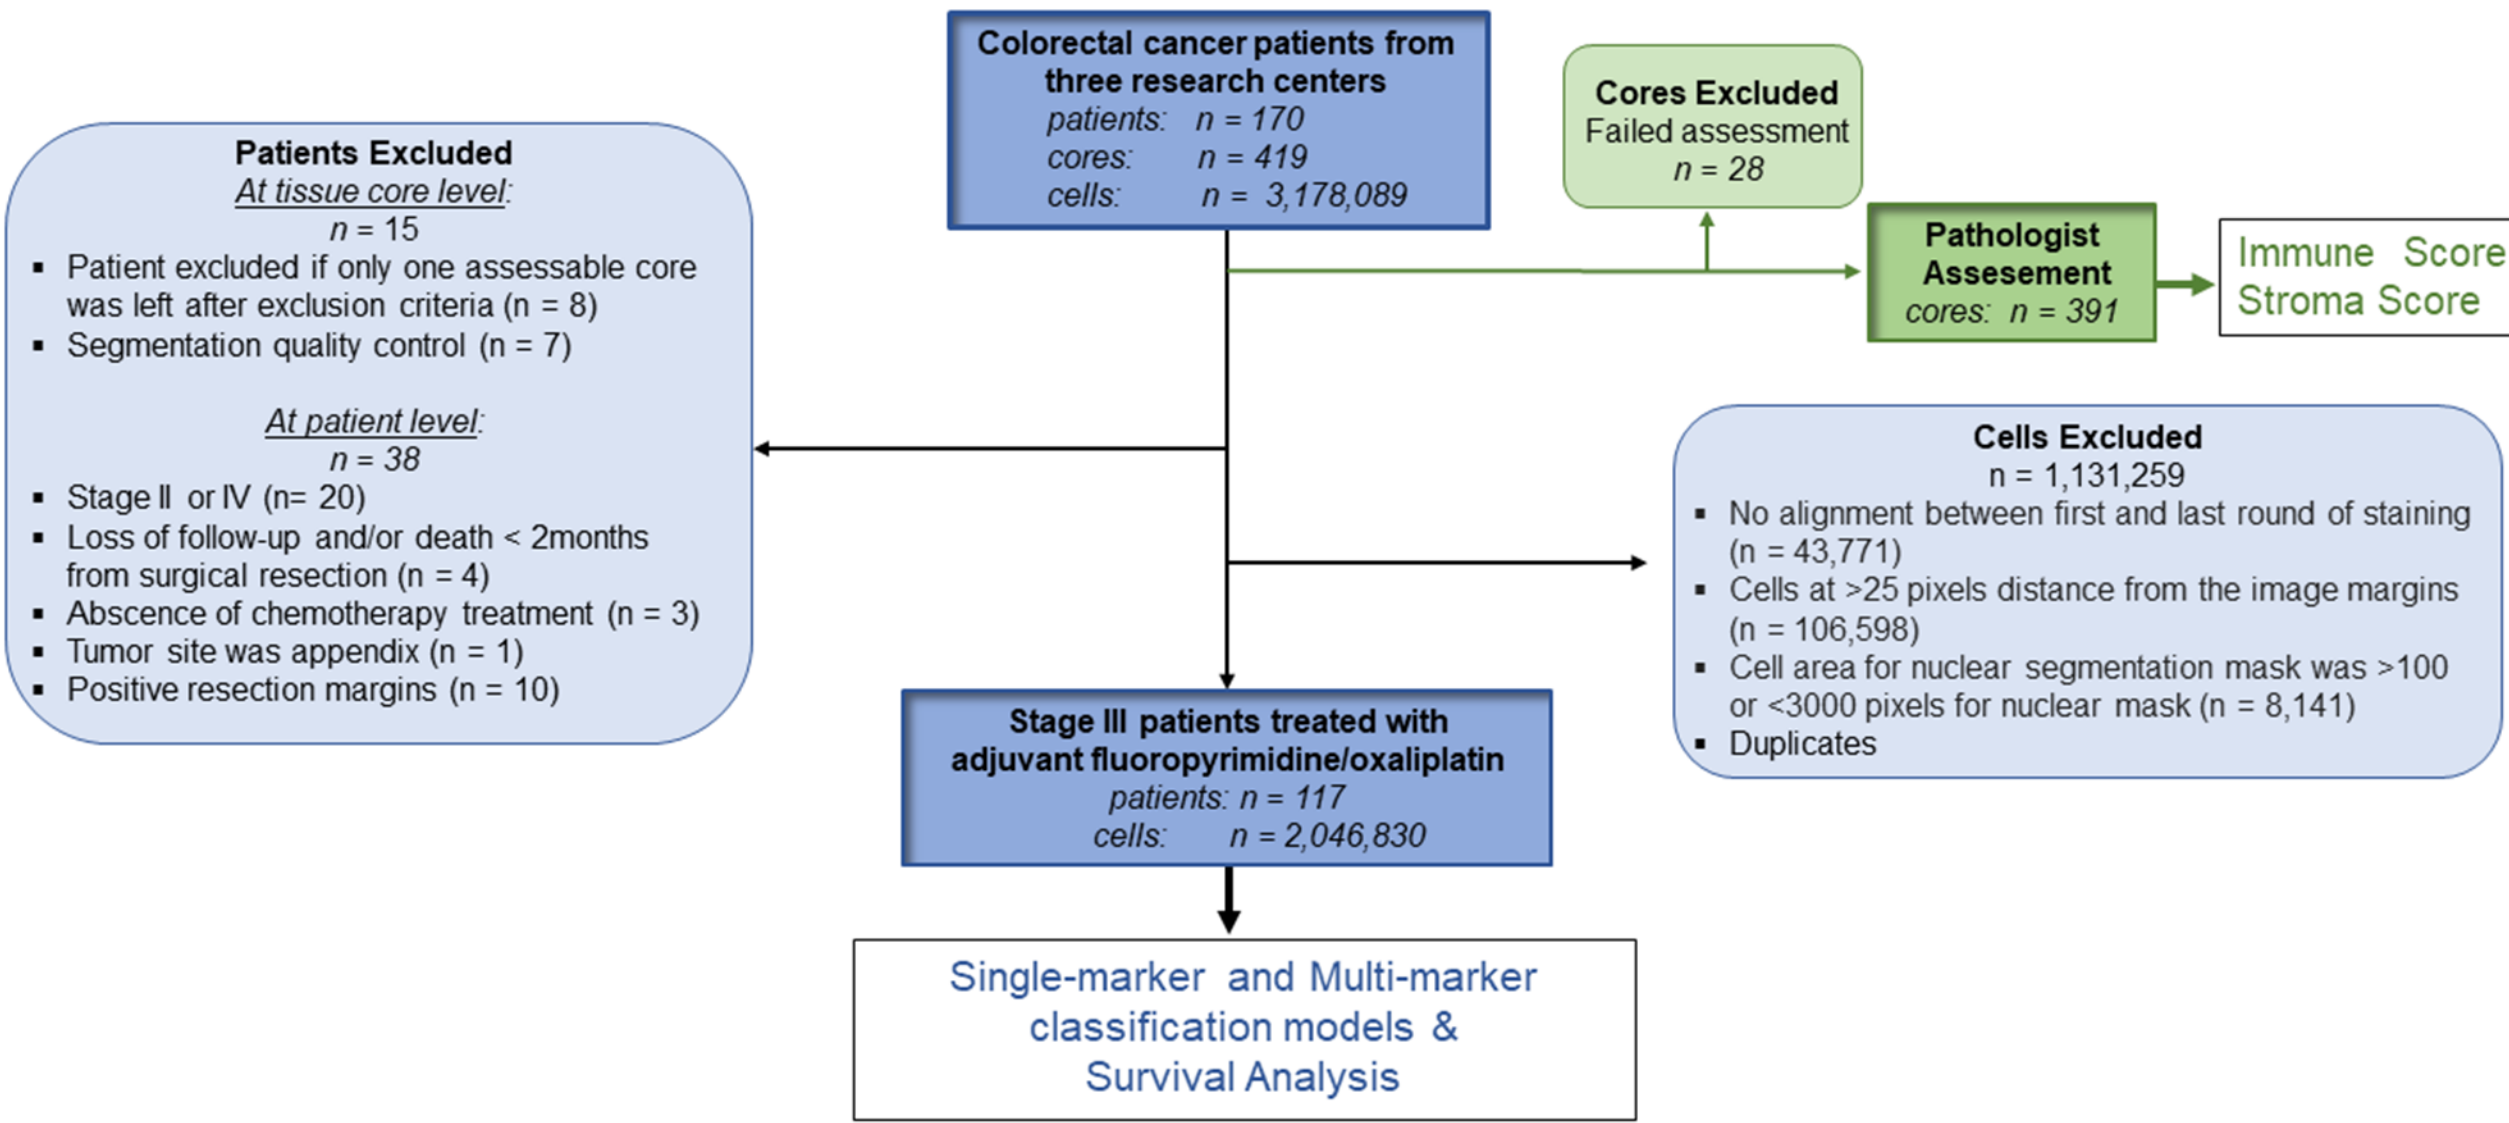

**Supplementary Figure 1.** CONSORT Flowchart: green boxes: participants for comparison of Pathologist's scores with Cell DIVE scores, blue boxes: analysis for association of single- and multi-marker classification with survival.

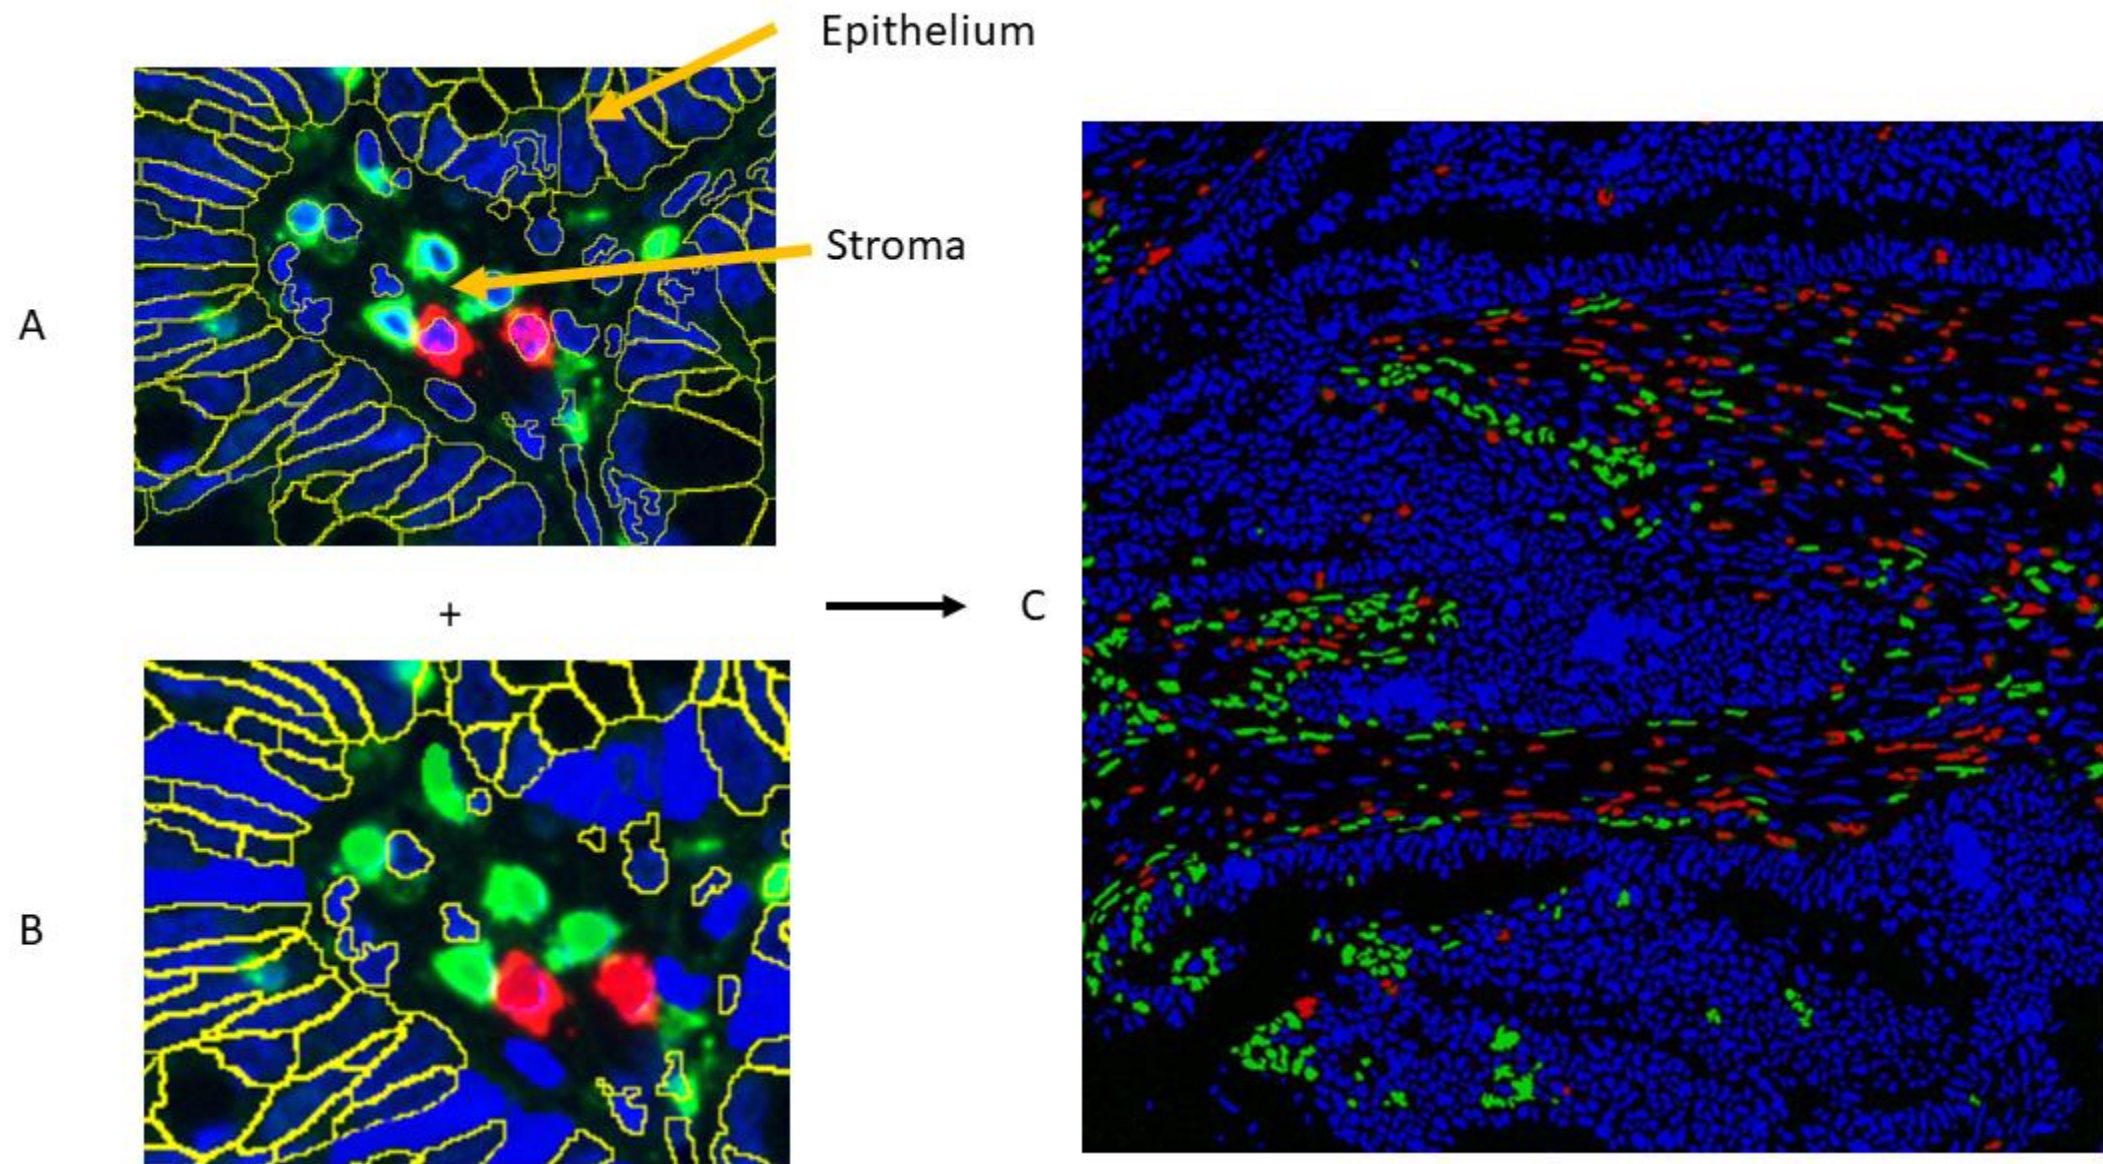

**Supplementary Figure 2.** Example images from the classification workflow. **(A)** Image showing generated epithelial and stromal nuclei segmentation masks overlaid on DAPI (blue), CD3 (green) and CD20 (red) images. **(B)** Annotations for a model classifying CD3 (green), CD20 (red), and negative cells (blue). **(C)** Predicted cell classes for a representative sample using the same color scheme as annotations. For multi-marker classification, the same cell is annotated based on multiple marker expression. This process is further described in Santamaria-Pang et al 2017<sup>51</sup>.

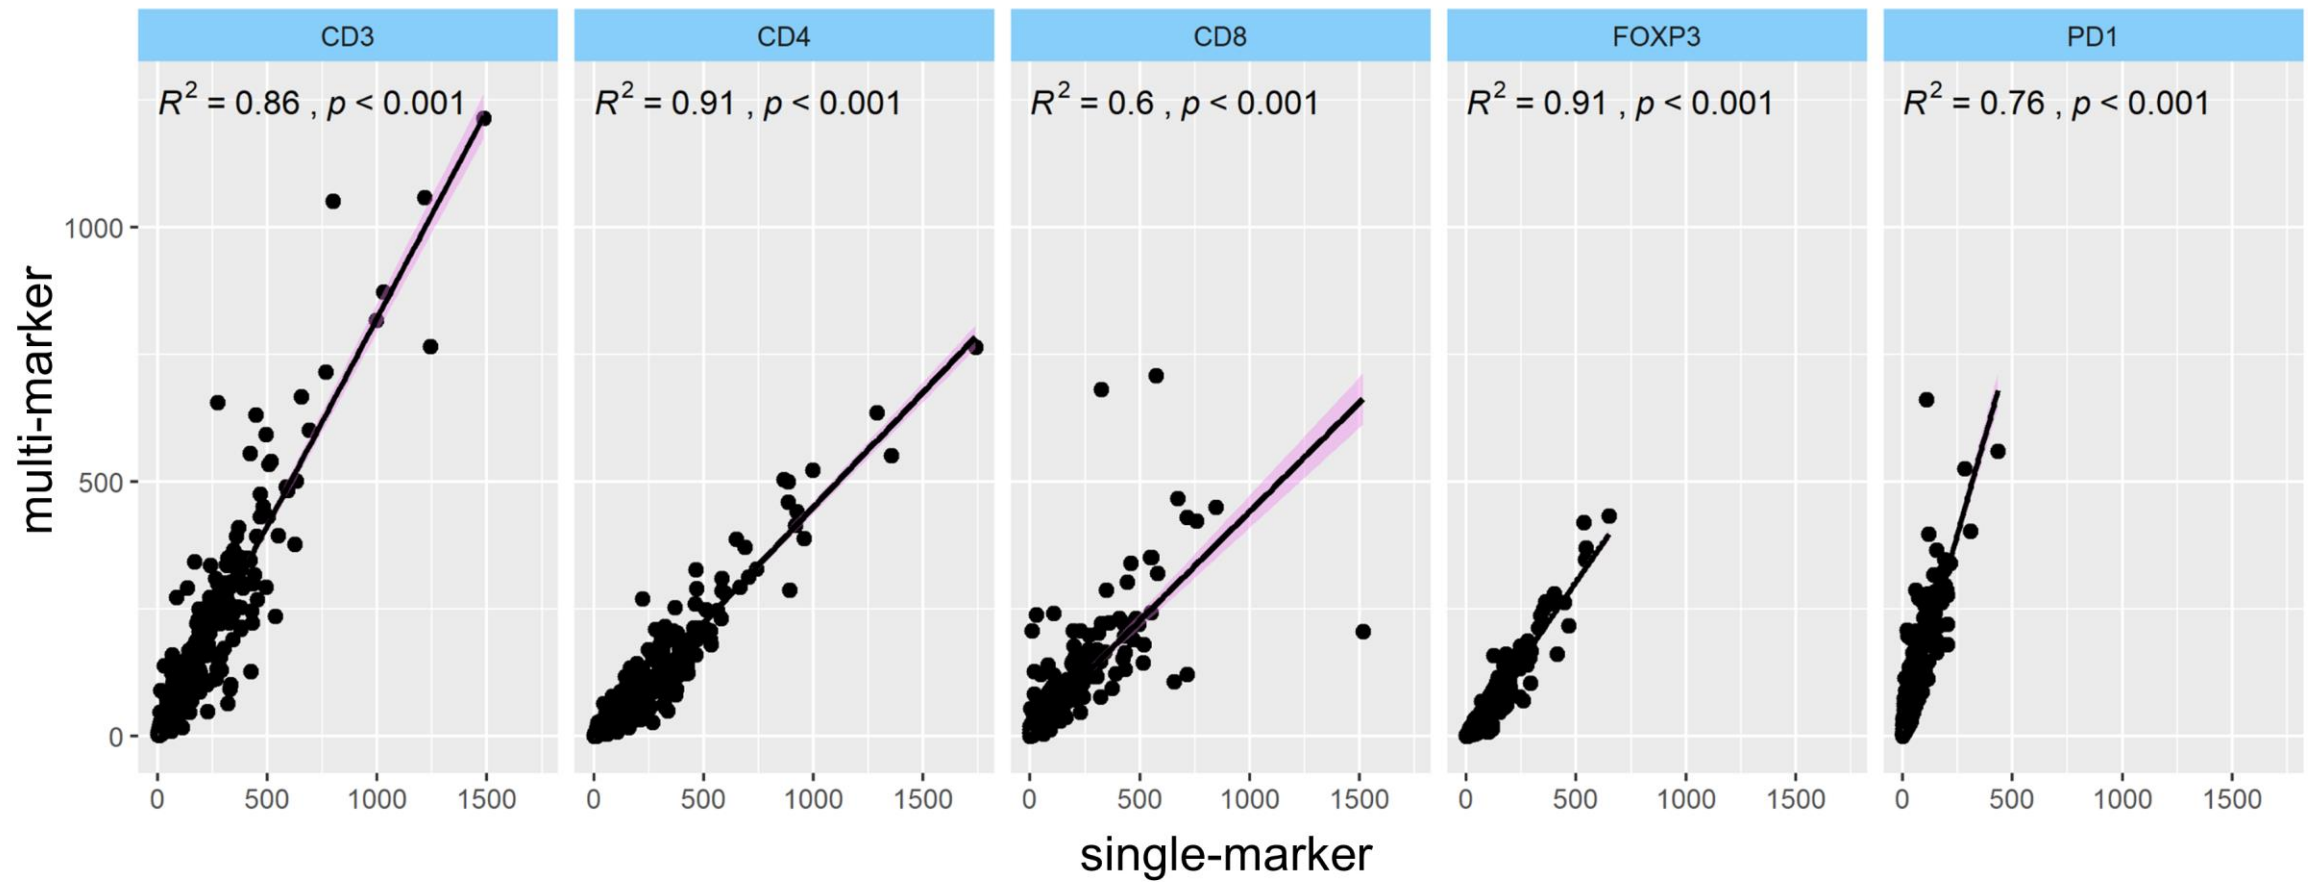

**Supplementary Figure 3.** Pearson Correlations between cell counts for single-marker model (x-axis) and multi-marker (y-axis) classification. **CD3:** CD3 vs Tc+/TcPD1+/Th+/ThPD1+/Treg+/TregPD1, **CD4:** CD4 vs Th+/ThPD1+/Treg+/TregPD1, **CD8:** CD8 vs Tc+/TcPD1, **FOXP3:** FOXP3 vs Treg+/TregPD1, **PD1:** PD1 vs TcPD1+/ThPD1+/TregPD1. The average counts of % of Total per patient were used for the analysis.  $R^2$  for CD3, CD4, CD8, FOXP3 and PD1 were 0.86, 0.91, 0.6, 1.91 and 0.76 respectively. P was  $<0.001$  for all combinations.

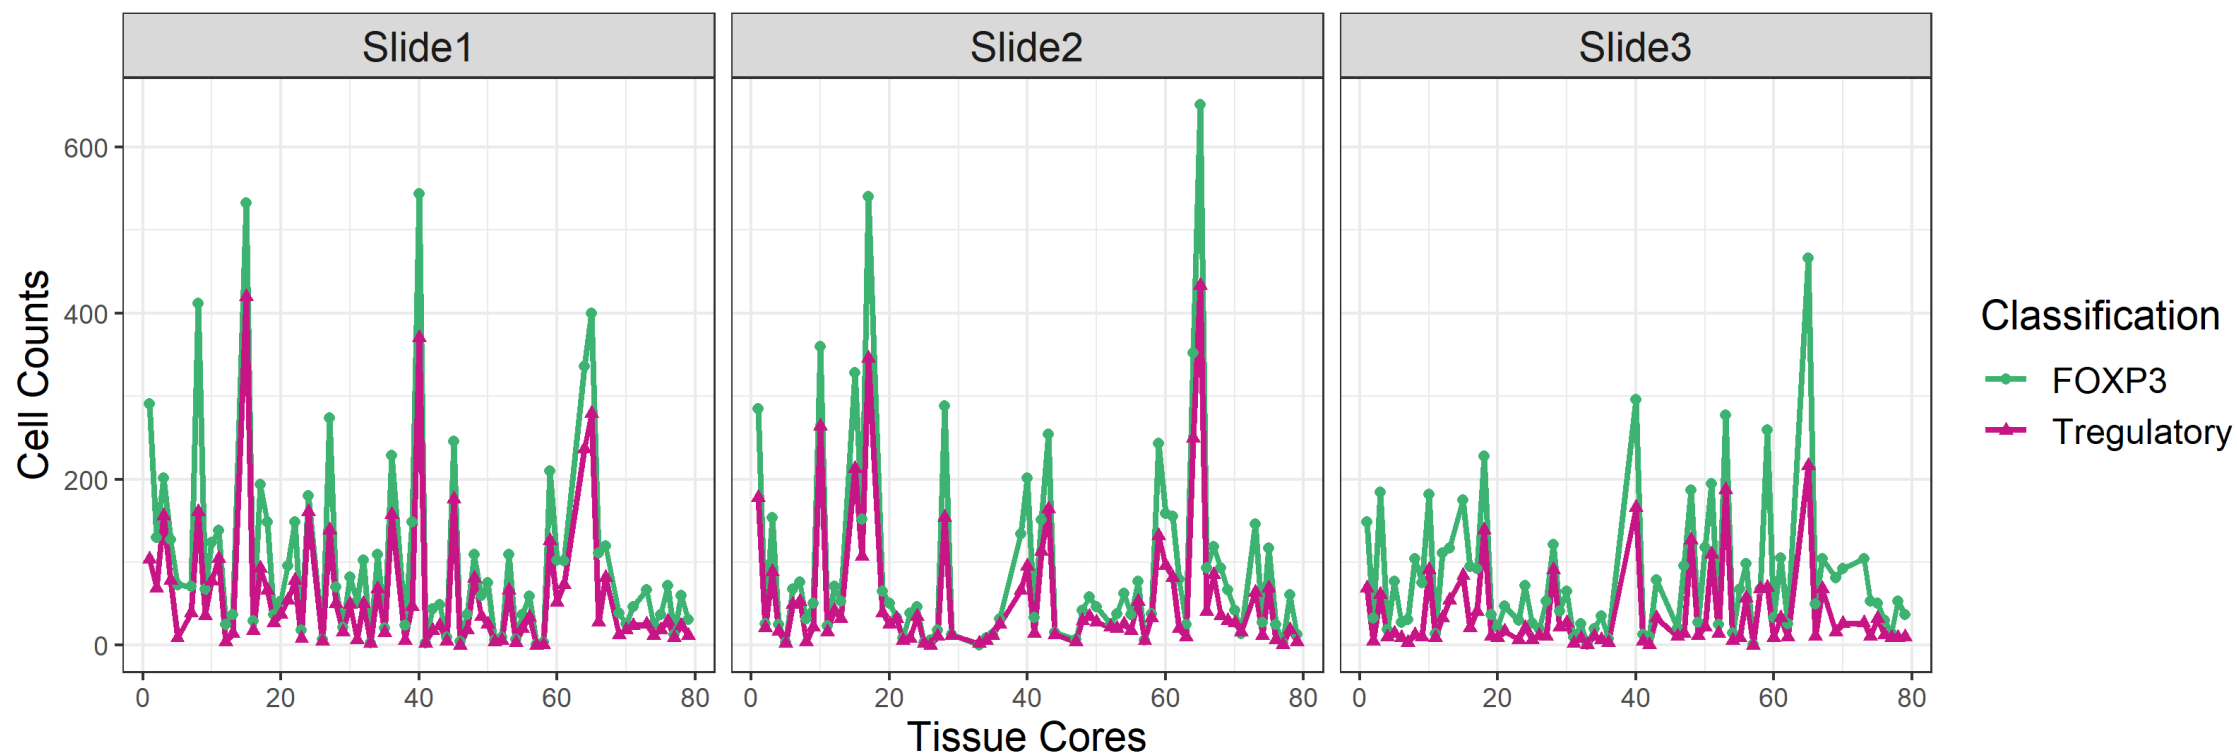

**Supplementary Figure 4.** Representative example of counts for the 79 patients with 3 cores (Slides 1-3) and comparison of single marker FOXP3 (green) vs multi-marker Treg (TregPD1- and TregPD1+) (purple) counts, per core. As FOXP3 is a marker for Treg cells, single marker FOXP3 counts are similar to the multi-marker Treg CD3+/CD4+/FOXP3+/(PD1+/-) counts.



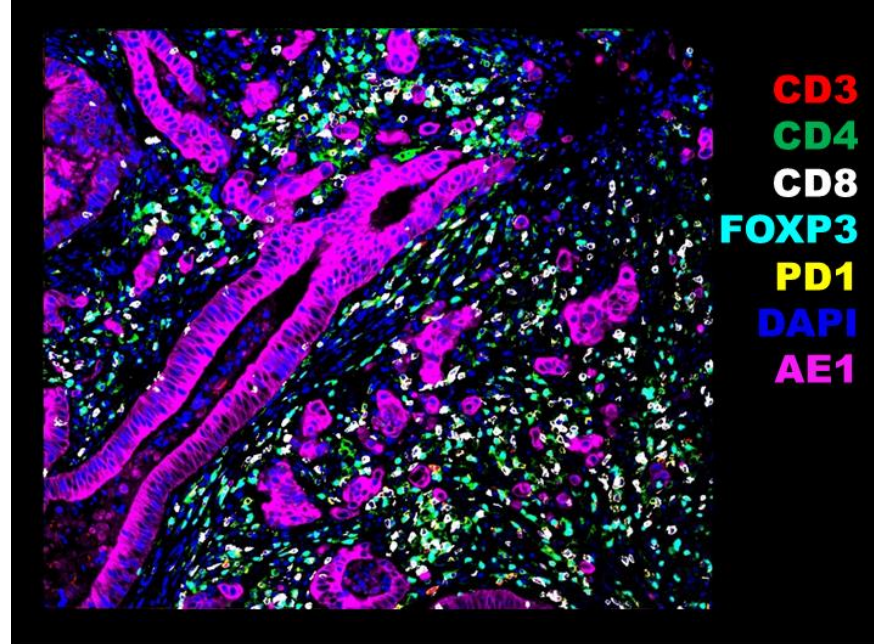

### Segmentation Masks and Staining

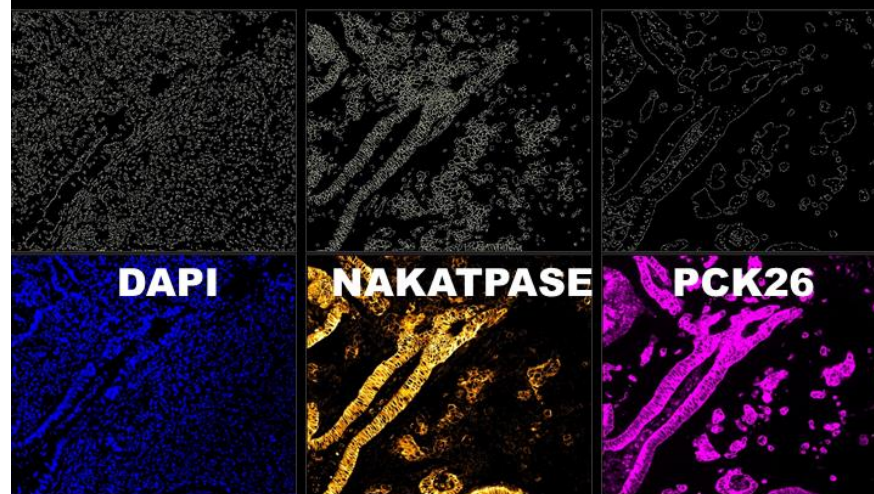

### T cell Marker Staining

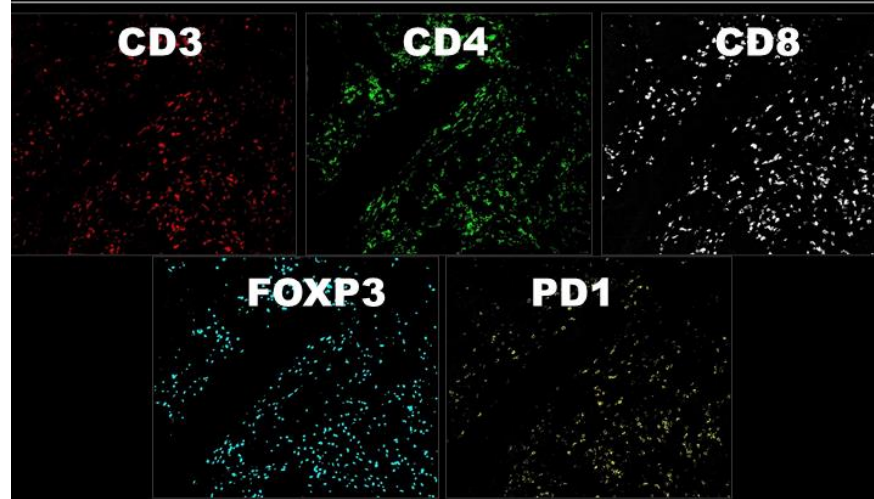

**Supplementary Figure 5.** Panel of representative multiplexed image with the corresponding segmentation masks and individual staining for each antibody used for T cell classification and segmentation in this study. For segmentation, DAPI, *Na K ATPase* and *PCK26* were used for the nuclear, membrane and epithelial mask, respectively. For the classification workflows, *CD3*, *CD4*, *CD8*, *FOXP3* and *PD1* markers were used.

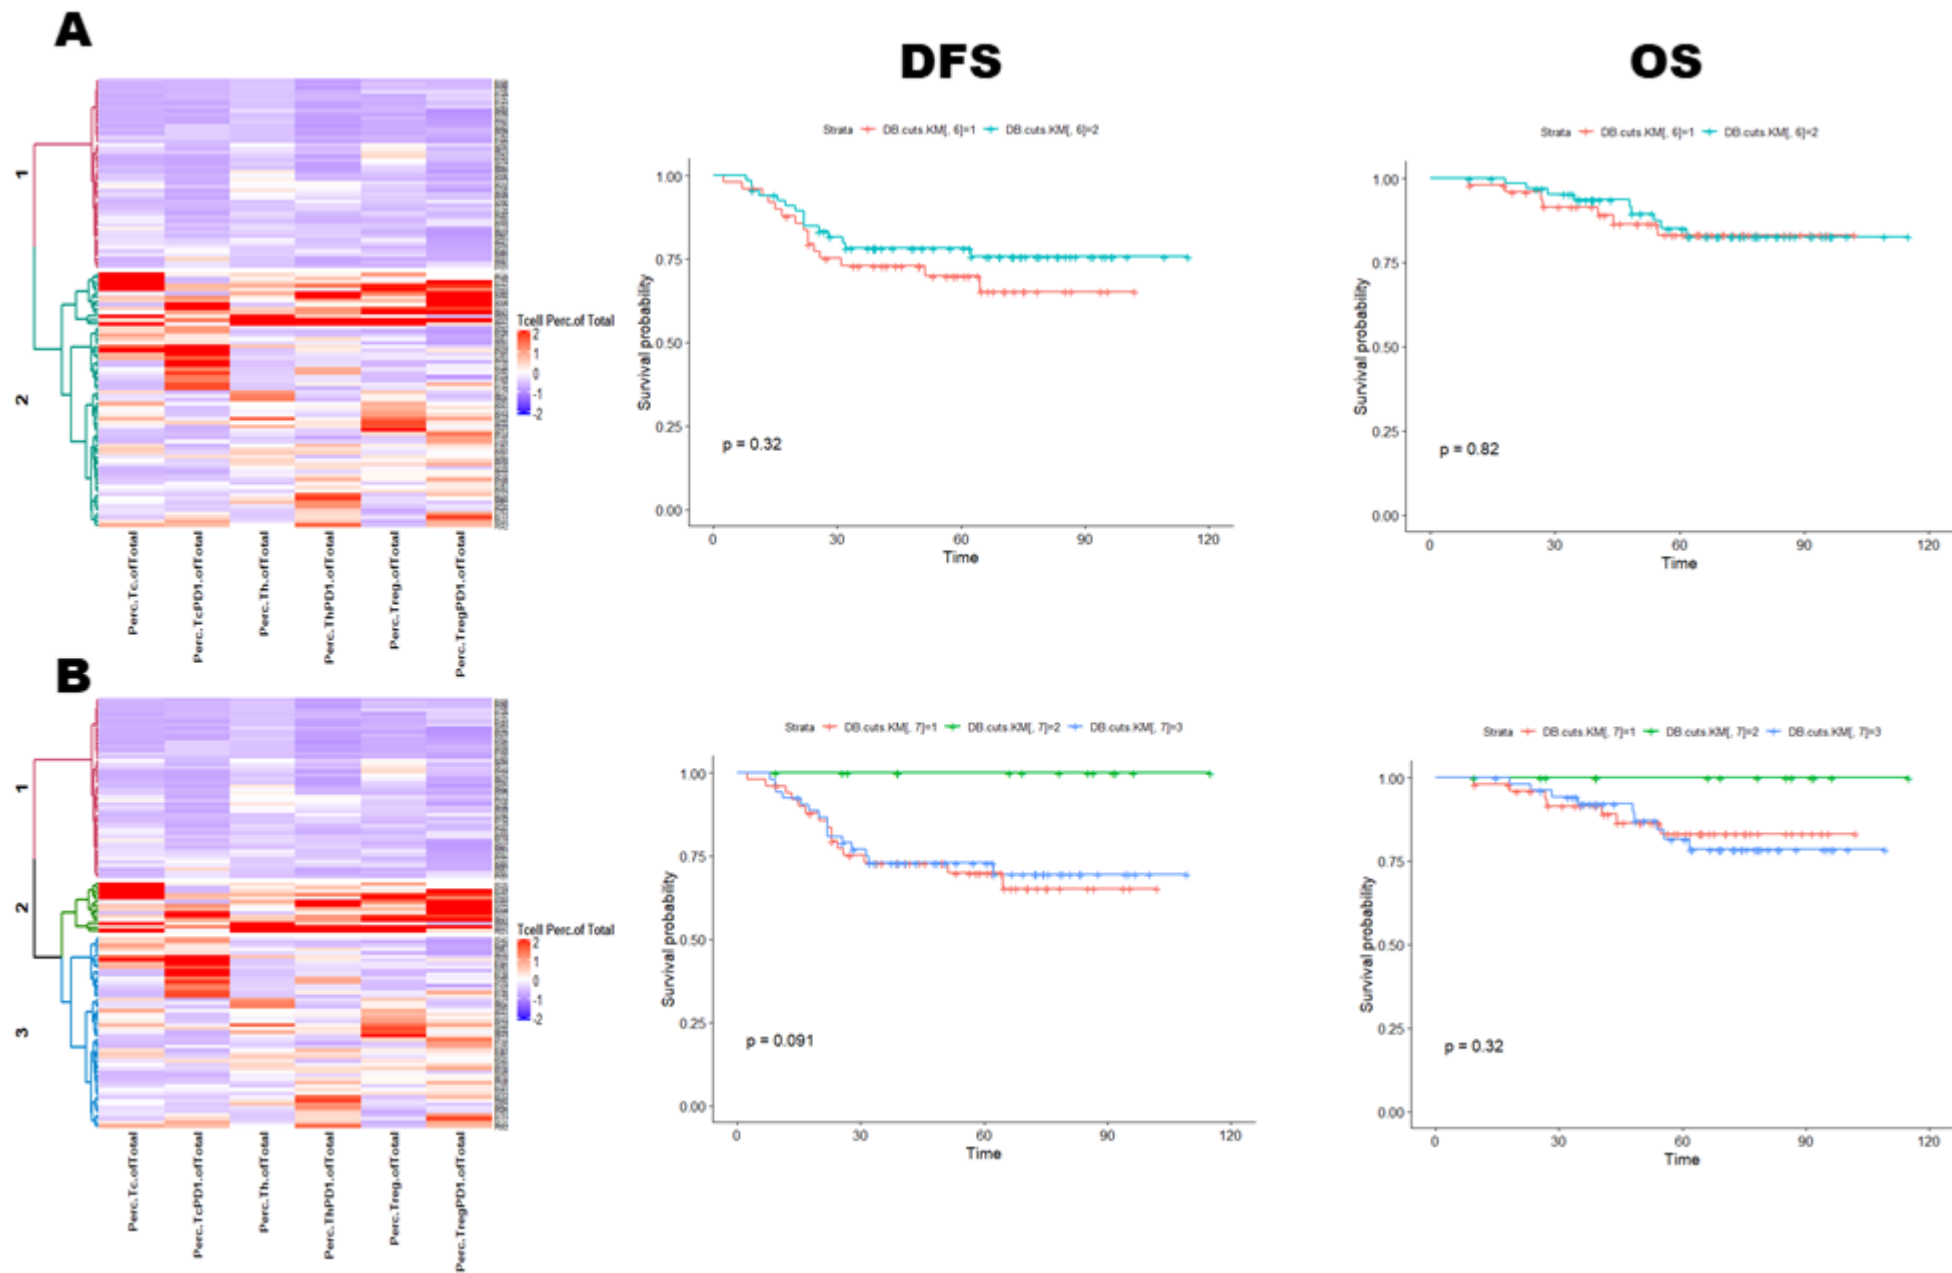

**Supplementary Figure 6.** Heatmaps showing separation and clustering of patients based on % T cells of Total T cell subtypes in tumor cores. Clusters based on the Ward.D agglomerative clustering method with Euclidean correlation distance measure. Kaplan-Meier curves color-coded for the corresponding 2 (**A**) and 3 (**B**) clusters of patients, demonstrating univariate survival analysis for DFS and OS. Differences in Kaplan–Meier survival curves are presented as log-rank p value.

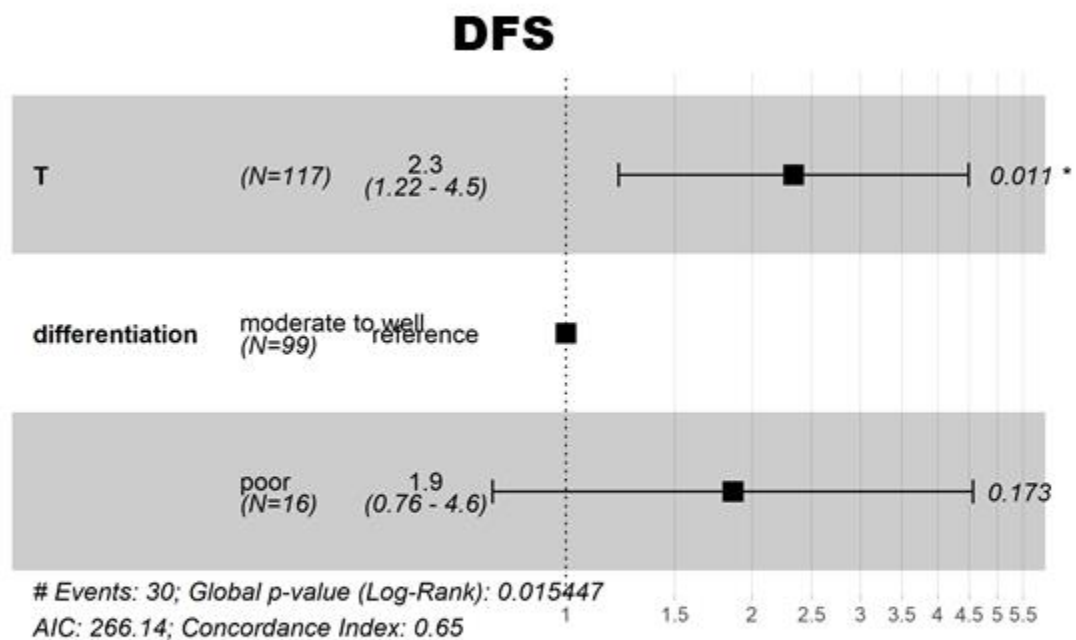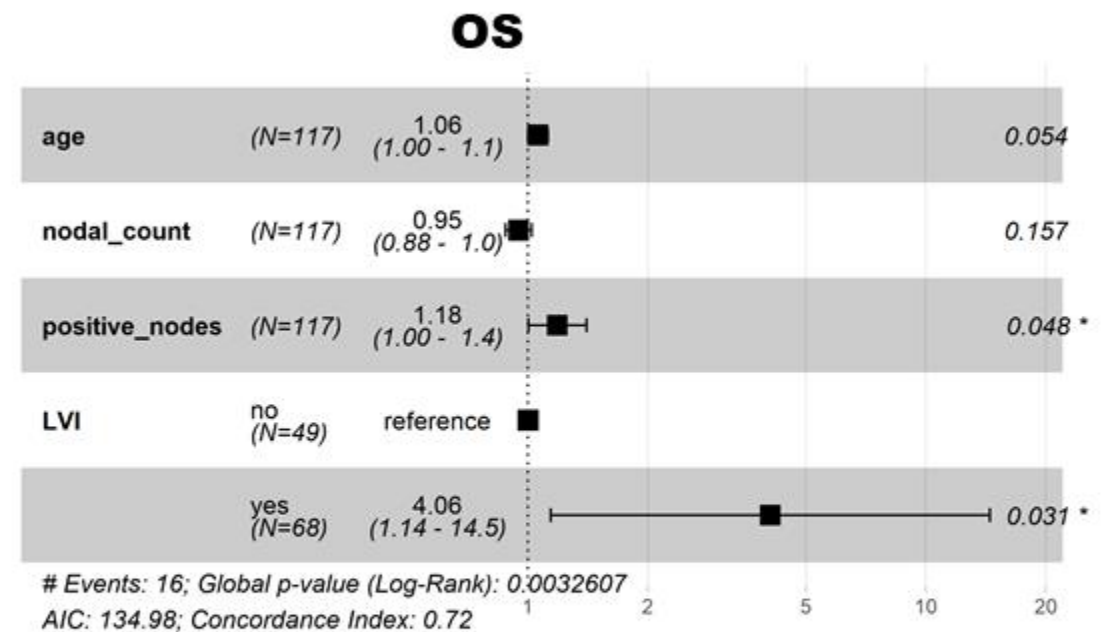

**Supplementary Figure 7.** Forest plots of multivariate Cox proportional hazards models for clinical variables after backward elimination. HRs, 95% CIs, and p values from likelihood ratio tests from univariate Cox proportional hazards models were calculated to explore the associations between the percent of total classified cells with the risks of recurrence (DFS) and death (OS). The clinical variables included in the model were: T, N, age, sex, nodal count, positive nodes, differentiation, lymphovascular invasion (LVI).

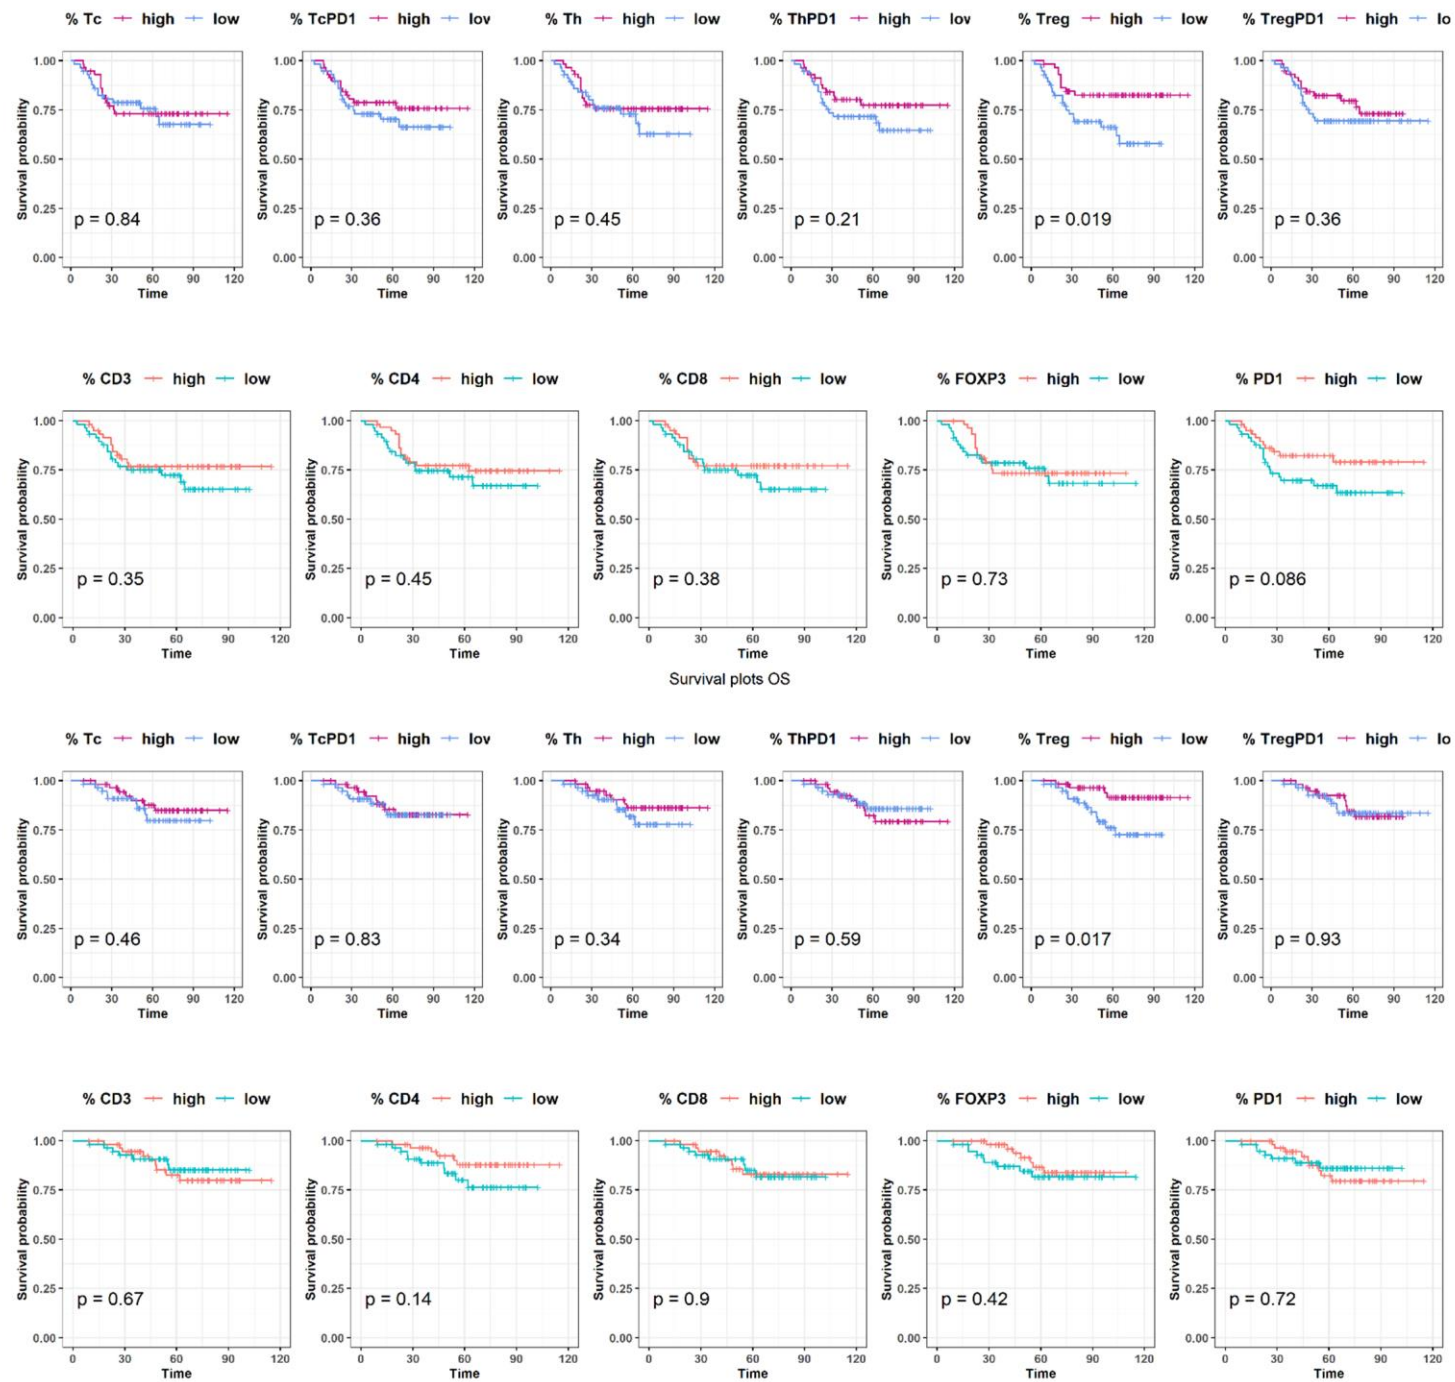

**Supplementary Figure 8.** Univariate survival analysis using Kaplan-Meier curves for single-marker and multi-marker T cell subtypes using the average percentage of total T cells for each patient (average of each patient's cores). The patients were dichotomized using the median as cut-off for DFS and OS. For multi-marker subtypes the groups were color-coded: high (red) – low (blue) and for the single-marker subtypes: high (orange) – low (green). The top two panels represent DFS and the lower two panels OS. Differences in Kaplan–Meier survival curves are presented as log-rank P value.

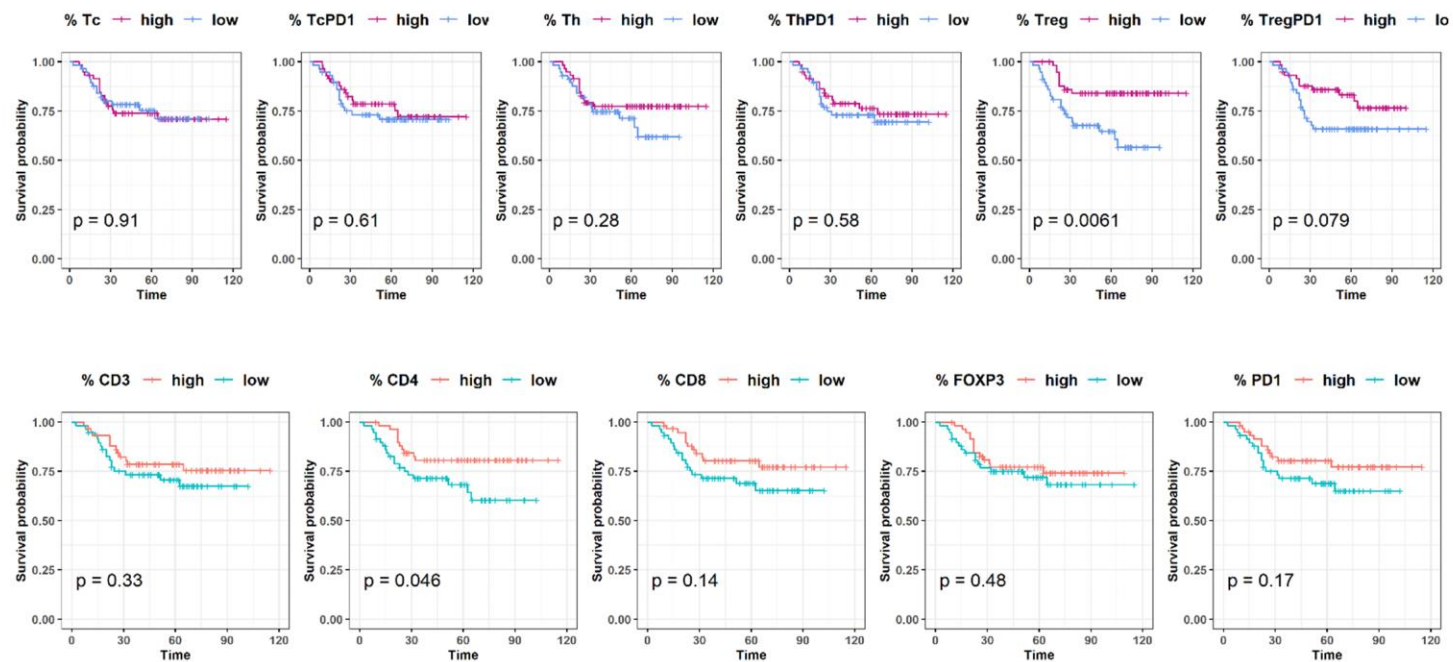

Survival plots OS

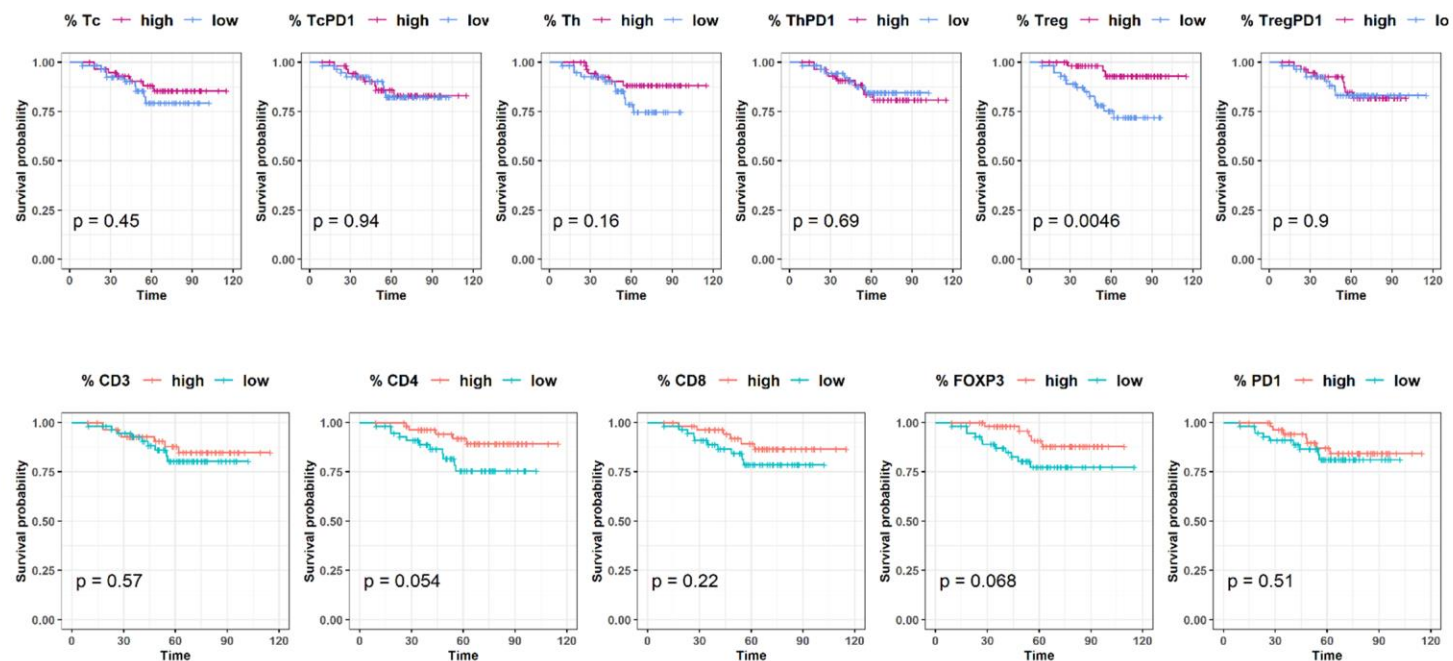

**Supplementary Figure 9.** Univariate survival analysis using Kaplan-Meier curves for single-marker and multi-marker T cell subtypes as percentage of total for immune hot-spot cores. The patients were dichotomized using the median as cut-off for DFS and OS. For multi-marker subtypes the groups were color-coded: high (red) – low (blue) and for the single-marker subtypes: high (orange) – low (green). The top two panels represent DFS and the lower two panels OS. Differences in Kaplan–Meier survival curves are presented as log-rank P value.
